# Supplementary material for: Molecular and phenotypic profiling of colorectal cancer patients in West Africa reveals biological insights
Source: PubMed Central journal article supplement (PMC8613248; doi:10.1038/s41467-021-27106-w), 2021-11-24

**SUPPLEMENTARY INFORMATION**

**Supplementary Figure 1:** Proportional representation of genetically determined ancestry for patients from Memorial Sloan Kettering Cancer Center (MSKCC) and Nigeria (Nigerian  $n = 63$ , MSKCC African American  $n = 65$ , MSKCC Other Races  $n = 539$ ). EUR: European, EAS: East Asian, NAM: Native American, SAS: South East Asian, AFR: African.

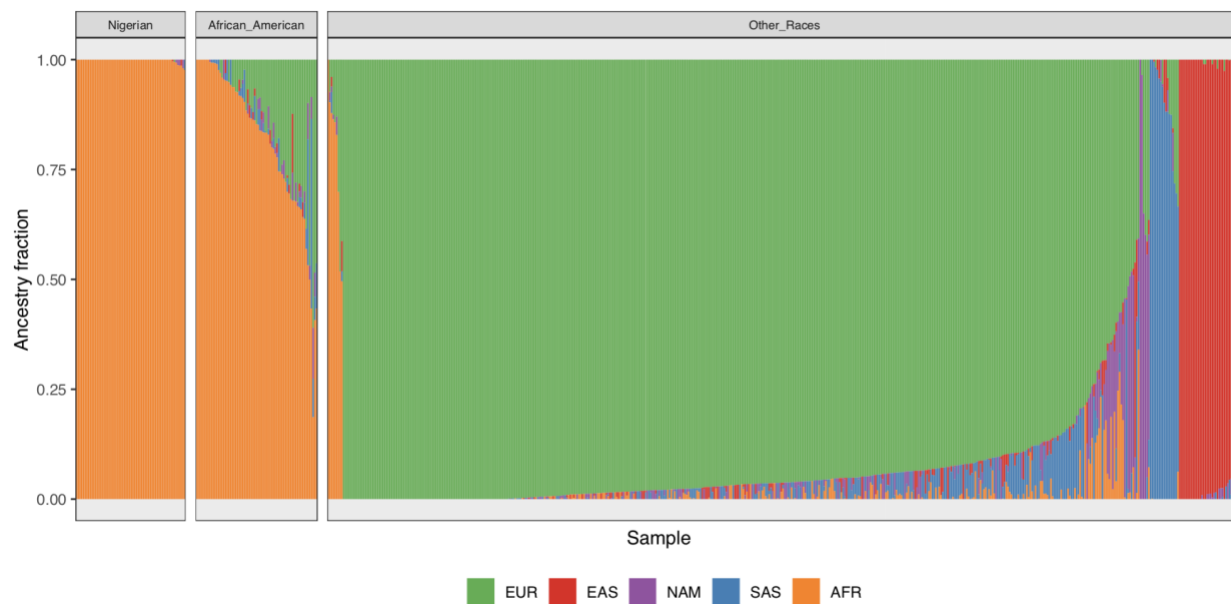

**Supplementary Figure 2:** MSI sensor score (a) and total tumor mutation burden (b) by molecular subtype (MSI status) for Nigerian colorectal cancer specimens ( $n = 64$ ).  $P$  value by 2-sided Wilcoxon sum test. Boxplots show distribution with the minimum, maximum, median (line), and the first and third quartiles (bottom and top of box, respectively). MSI-H: microsatellite instability high, MSS: microsatellite stable.

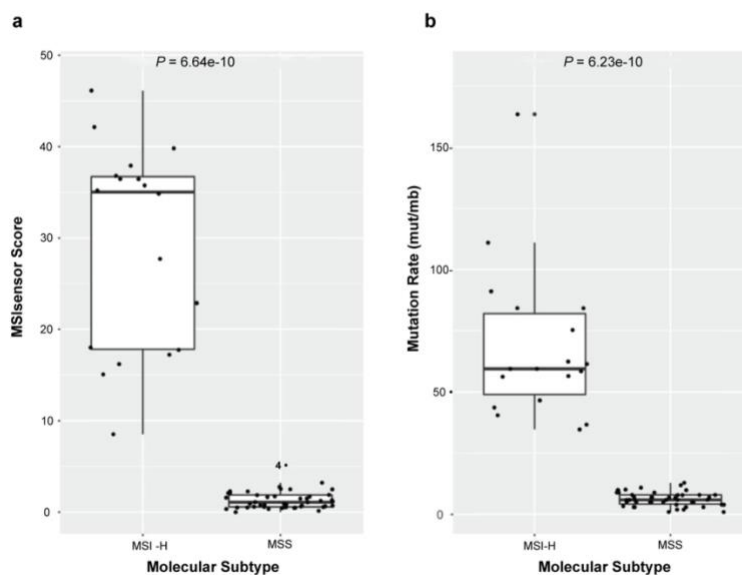

**Supplementary Table 1:** Treatment comparison

| <b>Treatment Modality</b>                | <b>MSKCC<br/>(n = 458)</b> | <b>Nigeria<br/>(n = 380)</b> | <b>P value*</b> |
|------------------------------------------|----------------------------|------------------------------|-----------------|
| Surgery                                  | 400 (87.3)                 | 247 (71.0)                   | <0.001          |
| Unknown                                  | 0                          | 32                           |                 |
| Chemotherapy                             | 321 (70.1)                 | 177 (61.0)                   | 0.01            |
| Unknown                                  | 0                          | 90                           |                 |
| Timing of chemotherapy                   |                            |                              |                 |
| Adjuvant                                 | 52 (16.2)                  | 74 (42.5)                    | <0.001          |
| Neoadjuvant                              | 269 (83.8)                 | 100 (57.5)                   |                 |
| Unknown                                  | 0                          | 3                            |                 |
| Pelvic radiotherapy (rectal cancer only) |                            |                              |                 |
| Yes                                      | 98 (63.6)                  | 9 (4.8)                      | <0.001          |
| No                                       | 56 (36.4)                  | 179 (95.2)                   |                 |
| Surgery for stage IV disease             | 106 (71.6)                 | 124 (67.0)                   | 0.40            |
| Unknown                                  | 0                          | 2                            |                 |

\* *P* values determined by two-sided Fisher's exact test

**Supplementary Figure 3:** (a) Overall survival, (b) overall survival stratified by colon and rectal primary, and (c) recurrence-free survival for Memorial Sloan Kettering (MSK) Cancer Center vs. Nigerian cohorts.

**a**

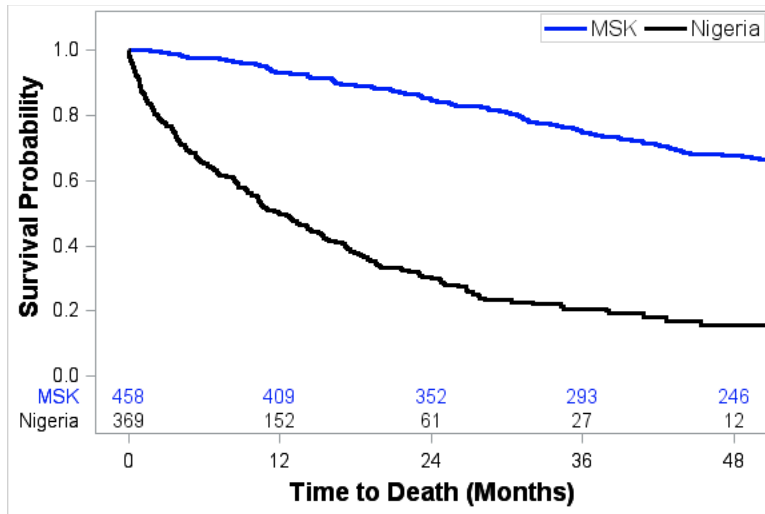

**b**

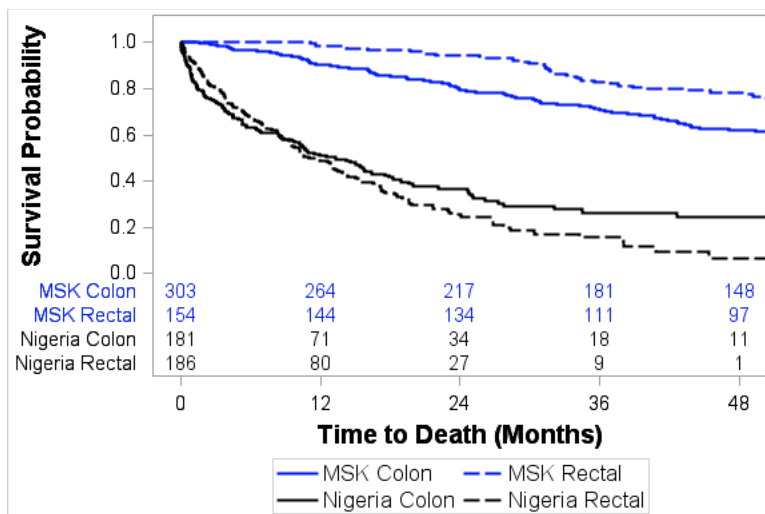

**c**

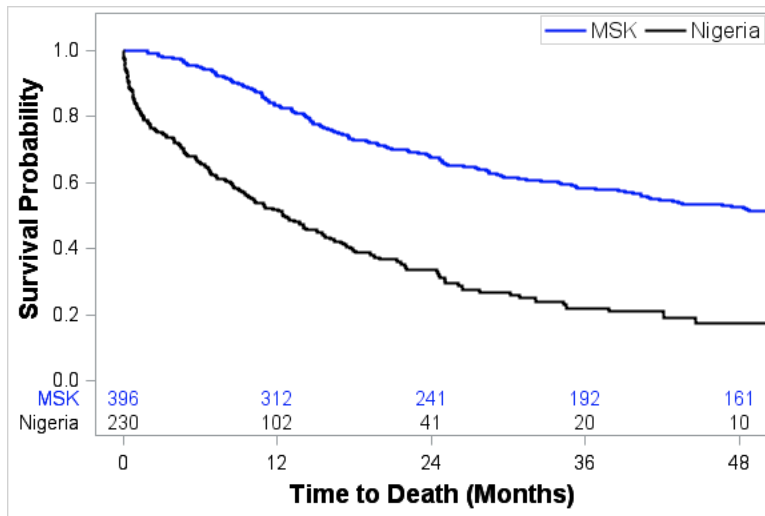

Supplement: 41467_2021_27106_MOESM1_ESM.pdf [file 41467_2021_27106_MOESM1_ESM.pdf]
